# Supplementary material
Source: MDPI journal article supplement (https://www.mdpi.com/2073-4441/13/22/3190)
Supplement: s1 [file s1]

Table S1 The original data of Figure 1(a).

| Name | Microalgae Number                | Maximum |         |          |         |
|------|----------------------------------|---------|---------|----------|---------|
|      |                                  | OD      | SD      | Days     | SD      |
|      | Unit                             | 680nm   |         | d        |         |
|      | X                                | Y1      | Y1Er±   | Y2       | Y2Er±   |
| 1    | <i>Micractinium sp.</i>          | 0.908   | 0.198   | 16       | 0       |
| 2    | <i>Leptolyngbya boryana</i>      | 0.4465  | 0.11682 | 14       | 1.73205 |
| 3    | <i>Desmodesmus sp.</i>           | 1.04283 | 0.32053 | 14.66667 | 2.3094  |
| 4    | <i>Pediastrum sp.</i>            | 0.48867 | 0.02122 | 11.33333 | 1.1547  |
| 5    | <i>Scenedesmus obliquus</i>      | 1.19033 | 0.31071 | 15.66667 | 0.57735 |
| 6    | <i>Synechocystis sp.</i>         | 0.76933 | 0.08429 | 15.66667 | 0.57735 |
| 7    | <i>Chlorella pyrenoidosa</i>     | 0.55122 | 0.08923 | 12.33333 | 2.51661 |
| 8    | <i>Chlamydomonas reinhardtii</i> | 0.742   | 0.15096 | 11.33333 | 1.1547  |
| 9    | <i>Nannochloropsis oceanica</i>  | 0.76842 | 0.17132 | 14       | 1.73205 |
| 10   | <i>Spirulina sp.</i>             | 0.73667 | 0.14647 | 12       | 6.9282  |

Table S2 The original data of Figure 1(b).

| Name | Microalgae Number           | Lipid    | SD       | Carbohydrate | SD       | Protein  | SD      |
|------|-----------------------------|----------|----------|--------------|----------|----------|---------|
|      |                             | %        |          | %            |          | %        |         |
|      | Unit                        | Y1       | Y1Er±    | Y2           | Y2Er±    | Y2       | Y3Er±   |
|      | X                           |          |          |              |          |          |         |
| 1    | <i>Micractinium sp.</i>     | 33.71674 | 3.26977  | 27.71481     | 5.73953  | 13.79768 | 3.32741 |
| 2    | <i>Leptolyngbya boryana</i> | 32.33333 | 2.51661  | 21.70667     | 2.85274  | 42.88455 | 0.51722 |
| 3    | <i>Desmodesmus sp.</i>      | 36.66568 | 16.69346 | 31.04303     | 11.62835 | 4.97916  | 0.34939 |
| 4    | <i>Pediastrum sp.</i>       | 35.15869 | 11.10388 | 32.47422     | 4.09176  | 6.95635  | 2.0241  |
| 5    | <i>Scenedesmus obliquus</i> | 48.19004 | 0.90137  | 21.26117     | 9.90468  | 11.30902 | 3.5572  |
| 6    | <i>Synechocystis sp.</i>    | 40.01008 | 12.08909 | 15.96927     | 3.50155  | 12.13682 | 5.91923 |

|    |                                  |          |         |          |          |          |         |
|----|----------------------------------|----------|---------|----------|----------|----------|---------|
| 7  | <i>Chlorella pyrenoidosa</i>     | 15.47262 | 5.6673  | 15.92064 | 0.7122   | 10.63342 | 5.10765 |
| 8  | <i>Chlamydomonas reinhardtii</i> | 19.02744 | 9.73274 | 25.02463 | 11.35999 | 8.83362  | 0.08146 |
| 9  | <i>Nannochloropsis oceanica</i>  | 21       | 1.73205 | 33.16549 | 14.57119 | 20.4495  | 6.46718 |
| 10 | <i>Spirulina sp.</i>             | 22.5244  | 3.51884 | 28.43066 | 2.60087  | 12.4926  | 2.73478 |

---

Table S3 The original data of Figure 2.

| Name | Microalgae Number                | Lipid    | Carbohydrate | Protein | Dry Weight | Biocrude conversion rate |
|------|----------------------------------|----------|--------------|---------|------------|--------------------------|
| Unit |                                  | mg/L/d   | mg/L/d       | mg/L/d  | mg/L/d     | %                        |
| 1    | <i>Micractinium sp.</i>          | 8.72708  | 2.54057      | 0.24981 | 41.64063   | 39.46143                 |
| 2    | <i>Leptolyngbya boryana</i>      | 1.3325   | 0.5175       | 0.18666 | 7.1875     | 26.61747                 |
| 3    | <i>Desmodesmus sp.</i>           | 7.98583  | 3.48223      | 0.18748 | 68.20312   | 35.91556                 |
| 4    | <i>Pediastrum sp.</i>            | 13.465   | 4.38544      | 0.27194 | 54.84375   | 39.63152                 |
| 5    | <i>Scenedesmus obliquus</i>      | 12.08317 | 1.16486      | 0.17606 | 40.54688   | 54.77054                 |
| 6    | <i>Synechocystis sp.</i>         | 8.115    | 1.39596      | 0.25516 | 27.10938   | 44.08742                 |
| 7    | <i>Chlorella pyrenoidosa</i>     | 3.10833  | 1.06971      | 0.18834 | 22.57812   | 33.67248                 |
| 8    | <i>Chlamydomonas reinhardtii</i> | 3.39583  | 2.12702      | 0.12315 | 23.04688   | 31.16919                 |
| 9    | <i>Nannochloropsis oceanica</i>  | 4.10083  | 1.65381      | 0.25559 | 32.8125    | 32.35888                 |
| 10   | <i>Spirulina sp.</i>             | 3.92167  | 2.02886      | 0.19768 | 23.28125   | 31.58076                 |

Table S4 The original data of Figure 3(a).

| Name | TN                               | SD       | TKN      | NO <sub>3</sub> <sup>-</sup> | NH <sub>4</sub> <sup>+</sup> | Organonitrogen |
|------|----------------------------------|----------|----------|------------------------------|------------------------------|----------------|
| Unit |                                  |          | mg/L     | mg/L                         | mg/L                         | mg/L           |
| X    | Y1                               | YEr±     |          |                              |                              |                |
| 0    | Initial                          | 57.8     | 56.2     | 1.15                         | 51.8                         | 4.4            |
| 1    | <i>Micractinium sp.</i>          | 46.10667 | 1.13738  | 40.3                         | 5.80667                      | 35.8           |
| 2    | <i>Leptolyngbya boryana</i>      | 50.77    | 1.90172  | 49.3                         | 1.47                         | 44.93333       |
| 3    | <i>Desmodesmus sp.</i>           | 31.23667 | 12.32895 | 25.46667                     | 5.77                         | 19.18          |
| 4    | <i>Pediastrum sp.</i>            | 31.33    | 14.42798 | 29.5                         | 1.83                         | 27.26667       |
| 5    | <i>Scenedesmus obliquus</i>      | 43.57    | 0.36373  | 40.13333                     | 3.43667                      | 36.9           |
| 6    | <i>Synechocystis sp.</i>         | 54.47333 | 6.10837  | 45.16667                     | 9.30667                      | 39.96667       |
| 7    | <i>Chlorella pyrenoidosa</i>     | 60.54    | 9.97661  | 49.1                         | 11.44                        | 40.03333       |
| 8    | <i>Chlamydomonas reinhardtii</i> | 52.01333 | 3.56225  | 50.9                         | 1.11333                      | 43.26667       |
| 9    | <i>Nannochloropsis oceanica</i>  | 47.87    | 4.44338  | 39.3                         | 8.57                         | 35.4           |
| 10   | <i>Spirulina sp.</i>             | 49.30333 | 1.53575  | 47.9                         | 1.40333                      | 44.3           |

Table S5 The original data of Figure 3(b).

| Name | TP                          | SD      | PO <sub>4</sub> <sup>3+</sup> | Organophosphorus |
|------|-----------------------------|---------|-------------------------------|------------------|
| Unit | mg/L                        |         | mg/L                          | mg/L             |
| X    | Y                           | YEr±    |                               |                  |
| 0    | Initial                     | 5.1     | 4.08                          | 1.02             |
| 1    | <i>Micractinium sp.</i>     | 1.88333 | 1.20106                       | 1.12667          |
| 2    | <i>Leptolyngbya boryana</i> | 4.87667 | 1.00481                       | 4.63333          |
| 3    | <i>Desmodesmus sp.</i>      | 2.15333 | 0.10599                       | 0.51667          |
| 4    | <i>Pediastrum sp.</i>       | 2.15    | 2.16564                       | 1.76             |
| 5    | <i>Scenedesmus obliquus</i> | 0.91    | 0.86377                       | 0.59667          |

|    |                                  |         |         |         |         |
|----|----------------------------------|---------|---------|---------|---------|
| 6  | <i>Synechocystis</i> sp.         | 4.03333 | 1.57424 | 3.65333 | 0.38    |
| 7  | <i>Chlorella pyrenoidosa</i>     | 4.71333 | 0.26274 | 3.63667 | 1.07667 |
| 8  | <i>Chlamydomonas reinhardtii</i> | 5.16333 | 2.23168 | 4.57    | 0.59333 |
| 9  | <i>Nannochloropsis oceanica</i>  | 2.27    | 2.23168 | 1.73    | 0.54    |
| 10 | <i>Spirulina</i> sp.             | 4.93667 | 0.10263 | 4.62    | 0.31667 |

---

Table S6 The original data of Figure 4

| sample | MDS1     | MDS2     | MDS3     |
|--------|----------|----------|----------|
| MS-1   | -0.40705 | -0.03677 | -0.08352 |
| MS-2   | -0.24097 | 0.202386 | 0.29821  |
| MS-3   | -0.0554  | -0.08659 | -0.14189 |
| LB-1   | 0.469102 | 0.16544  | -0.07259 |
| LB-2   | 0.540244 | 0.08199  | 0.021636 |
| LB-3   | 0.295924 | 0.228651 | -0.05393 |
| DS-1   | -1.00081 | -0.27374 | 0.232845 |
| DS-2   | -0.09743 | 0.116707 | 0.362656 |
| DS-3   | -0.94696 | -0.32287 | 0.210061 |
| PS-1   | -0.50656 | 0.465923 | -0.18656 |
| PS-2   | 0.287213 | 0.085099 | 0.174312 |
| PS-3   | -0.4814  | 0.463928 | -0.20238 |
| SO-1   | -0.35538 | 0.248144 | -0.07821 |
| SO-2   | -0.04993 | 0.290627 | 0.049032 |
| SO-3   | -0.3467  | 0.19718  | -0.09944 |
| SyS-1  | 0.218163 | -0.34108 | -0.38319 |
| SyS-2  | -0.00496 | 0.199117 | 0.184112 |
| SyS-3  | 0.245295 | -0.3732  | -0.35413 |
| CP-1   | 0.099198 | -0.87641 | 0.003004 |
| CP-2   | 0.245506 | 0.067139 | 0.263677 |
| CP-3   | 0.080312 | -0.86453 | -0.00292 |
| CR-1   | 0.543738 | -0.06608 | 0.221283 |
| CR-2   | 0.271959 | 0.117616 | 0.09738  |

|       |          |          |          |
|-------|----------|----------|----------|
| CR-3  | 0.520283 | -0.0495  | 0.242492 |
| NO-1  | -0.1948  | -0.05453 | -0.1109  |
| NO-2  | -0.09468 | -0.37023 | -0.08814 |
| NO-3  | -0.28008 | 0.229152 | -0.35898 |
| SpS-1 | 0.422087 | 0.204465 | -0.0974  |
| SpS-2 | 0.394059 | 0.154151 | 0.055088 |
| SpS-3 | 0.430025 | 0.197803 | -0.10159 |

---
